# Supplementary material
Source: PubMed Central journal article supplement (PMC3032079)
Supplement: mmc1.pdf [file mmc1.pdf]

The American Journal of Human Genetics, Volume 86

## **Supplemental Data**

### **Identification of a Kir3.4 Mutation**

#### **in Congenital Long QT Syndrome**

**Yanzong Yang, Yiqing Yang, Bo Liang, Jinqiu Liu, Jun Li, Morten Grunnet, Søren-Peter Olesen, Hanne B. Rasmussen, Patrick T. Ellinor, Lianjun Gao, Xiaoping Lin, Li Li, Lei Wang, Junjie Xiao, Yi Liu, Ying Liu, Shulong Zhang, Dandan Liang, Luying Peng, Thomas Jespersen, and Yi-Han Chen**

**Table S1. Two-Point LOD Score of the Genome-wide Scan**

| Chr | Number of markers | Density range of markers (mean) (cM) | Peak LOD score | Genetic position of markers with peak LOD score (cM) <sup>a</sup> | Markers with positive LOD scores |
|-----|-------------------|--------------------------------------|----------------|-------------------------------------------------------------------|----------------------------------|
| 1   | 31                | 3.8-15.9 (9.25)                      | 0.21           | 266.27                                                            | D1S2785                          |
| 2   | 30                | 5.0-12.9 (9.11)                      | 0.11           | 152.04                                                            | D2S151                           |
| 3   | 23                | 4.5 -13.9 (9.87)                     | -1.43          | 207.73                                                            |                                  |
| 4   | 22                | 4.2-13.9 (9.91)                      | -∞             |                                                                   |                                  |
| 5   | 22                | 2.2-22.4 (9.50)                      | -∞             |                                                                   |                                  |
| 6   | 20                | 4.7-25.9 (9.97)                      | -1.14          | 18.22                                                             |                                  |
| 7   | 22                | 3.5-12.4 (8.45)                      | 0.69           | 53.50                                                             | D7S484, D7S517, D7S630           |
| 8   | 14                | 7.1-24.5 (10.92)                     | -1.05          | 71.00                                                             |                                  |
| 9   | 20                | 2.8-14.6 (8.18)                      | -∞             |                                                                   |                                  |
| 10  | 20                | 2.6-12.6 (9.13)                      | -0.18          | 40.36                                                             |                                  |
| 11  | 18                | 4.4-13.5 (8.38)                      | 1.74           | 127.33                                                            | D11S4151, D11S898                |
| 12  | 19                | 3.8-12.6 (9.22)                      | -1.44          | 147.17                                                            |                                  |
| 13  | 14                | 4.9-11.8 (8.24)                      | -1.29          | 25.08                                                             |                                  |
| 14  | 14                | 5.2-18.2 (9.88)                      | -1.77          | 117.30                                                            |                                  |
| 15  | 15                | 0.8-12.8 (7.58)                      | 0.28           | 14.58                                                             | D15S1002, D15S28                 |
| 16  | 13                | 5.3-18.7 (10.09)                     | -2.28          | 125.82                                                            |                                  |
| 17  | 15                | 0-13.7 (9.23)                        | 0.26           | 36.14                                                             | D17S921                          |
| 18  | 14                | 4.3-14.7 (9.83)                      | -1.91          | 52.86                                                             |                                  |
| 19  | 12                | 4.7-13.1 (8.09)                      | 0.27           | 92.56                                                             | D19S418                          |
| 20  | 13                | 2-11.9 (7.69)                        | -∞             |                                                                   |                                  |
| 21  | 5                 | 7.2-12.1 (9.63)                      | -0.98          | 35.45                                                             |                                  |
| 22  | 7                 | 6.6-10.4 (8.18)                      | -∞             |                                                                   |                                  |

<sup>a</sup>Genetic position is the relative position from pter to qter in cM and based on the data from the Center for Medical Genetics, Marshfield Medical Research Foundation, database.
